# Supplementary material for: A novel deep learning approach to identify embryo morphokinetics in multiple time lapse systems
Source: PubMed Central journal article supplement — Sci Rep. 2024 Nov 22;14:29016. doi: 10.1038/s41598-024-80565-1 (PMC11584792; doi:10.1038/s41598-024-80565-1), 2024-11-22
Supplement: 41598_2024_80565_MOESM1_ESM.pdf [file 41598_2024_80565_MOESM1_ESM.pdf]

# Supplementary Material: A Novel Deep Learning Approach with Transformer-GRU Architecture to identify embryo kinetic events

Tables S1 S2 and S3 show the F1-score, Precision and Recall (in %) per event on Embryoscope®, GERI® and MIRI® respectively. We can see the model performs better on Embryoscope which is reasonable considering 70% of the videos in the dataset come from this TLS. Also the test size for GERI® and MIRI® are quite limited (47 and 35 videos respectively) of which a significant portion are non developing embryos (49% and 37%).

| Event                   | Precision   | Recall      | F1-score    | n samples  |
|-------------------------|-------------|-------------|-------------|------------|
| t2                      | 95.8        | 96.3        | 96.1        | 190        |
| t3                      | 57.6        | 79.1        | 66.7        | 134        |
| t4                      | 87.1        | 72.7        | 79.3        | 176        |
| t5                      | 48.4        | 60.7        | 53.8        | 145        |
| t6                      | 69.4        | 80.7        | 74.7        | 135        |
| t7                      | 60.5        | 75.4        | 67.2        | 122        |
| t8                      | 49.7        | 43.7        | 46.5        | 176        |
| tM                      | 63.5        | 58.4        | 60.8        | 125        |
| tSB                     | 70.6        | 69.5        | 70.1        | 128        |
| tB                      | 73.1        | 76.3        | 74.7        | 114        |
| <b>Weighted average</b> | <b>68.6</b> | <b>71.4</b> | <b>69.5</b> | <b>193</b> |

Table S1: F1-score, Precision and Recall (in %) per event on Embryoscope®.  $N = 193$  embryos of which  $n = 5$  were non developing embryos.

| Event                   | Precision   | Recall      | F1-score    | n samples |
|-------------------------|-------------|-------------|-------------|-----------|
| t2                      | 88.6        | 81.6        | 84.9        | 38        |
| t3                      | 58.8        | 60.6        | 59.7        | 33        |
| t4                      | 83.3        | 44.1        | 57.7        | 34        |
| t5                      | 44.4        | 44.4        | 44.4        | 27        |
| t6                      | 71          | 68.7        | 69.8        | 32        |
| t7                      | 51.9        | 53.8        | 52.8        | 26        |
| t8                      | 53.8        | 56          | 54.9        | 25        |
| tM                      | 29.6        | 42.1        | 34.8        | 19        |
| tSB                     | 0           | 0           | 0           | 9         |
| tB                      | 71.4        | 78.9        | 75          | 19        |
| <b>Weighted average</b> | <b>61.9</b> | <b>57.6</b> | <b>58.9</b> | <b>47</b> |

Table S2: F1-score, Precision and Recall (in %) per event on GERI®.  $N = 47$  embryos of which  $n = 23$  were non developing embryos.

| <b>Event</b>            | <b>Precision</b> | <b>Recall</b> | <b>F1-score</b> | <b>n samples</b> |
|-------------------------|------------------|---------------|-----------------|------------------|
| t2                      | 82.8             | 80            | 81.4            | 30               |
| t3                      | 34.4             | 55            | 42.3            | 20               |
| t4                      | 57.1             | 33.3          | 42.1            | 24               |
| t5                      | 37.9             | 47.8          | 42.3            | 23               |
| t6                      | 55.6             | 71.4          | 62.5            | 21               |
| t7                      | 37.5             | 52.9          | 43.9            | 17               |
| t8                      | 33.3             | 31.6          | 32.4            | 19               |
| tM                      | 38.1             | 40            | 39              | 20               |
| tSB                     | 94.7             | 90            | 92.3            | 20               |
| tB                      | 31.6             | 30            | 30.8            | 20               |
| <b>Weighted average</b> | <b>52.1</b>      | <b>54.2</b>   | <b>52.3</b>     | <b>35</b>        |

Table S3: F1-score, Precision and Recall (in %) per event on MIRI®.  $N = 35$  embryos of which  $n = 13$  were non developing embryos.

| <b>Event</b>            | <b>F1-score w. poor</b> | <b>F1-score w/o. poor</b> |
|-------------------------|-------------------------|---------------------------|
| t2                      | 92.8                    | 96.7                      |
| t3                      | 62.7                    | 67.2                      |
| t4                      | 73.1                    | 77.9                      |
| t5                      | 51.3                    | 55.3                      |
| t6                      | 72.5                    | 76.2                      |
| t7                      | 62.5                    | 65.3                      |
| t8                      | 46.3                    | 47.1                      |
| tM                      | 54.4                    | 55.6                      |
| tSB                     | 70.4                    | 70.6                      |
| tB                      | 69.2                    | 69.7                      |
| <b>Weighted average</b> | <b>66.3</b>             | <b>68.7</b>               |

Table S4: F1-score (in %) per event after removing non-developing embryos from the test set.

Table S4 displays the F1-score per event of the BEE model on the test set before and after removing the poor embryos. Performances on earlier cleavage stages benefit the most from this removal. Performance on later events such as tM, tSB and tB do not change mainly due to the fact that these poor embryos do not reach these stages.

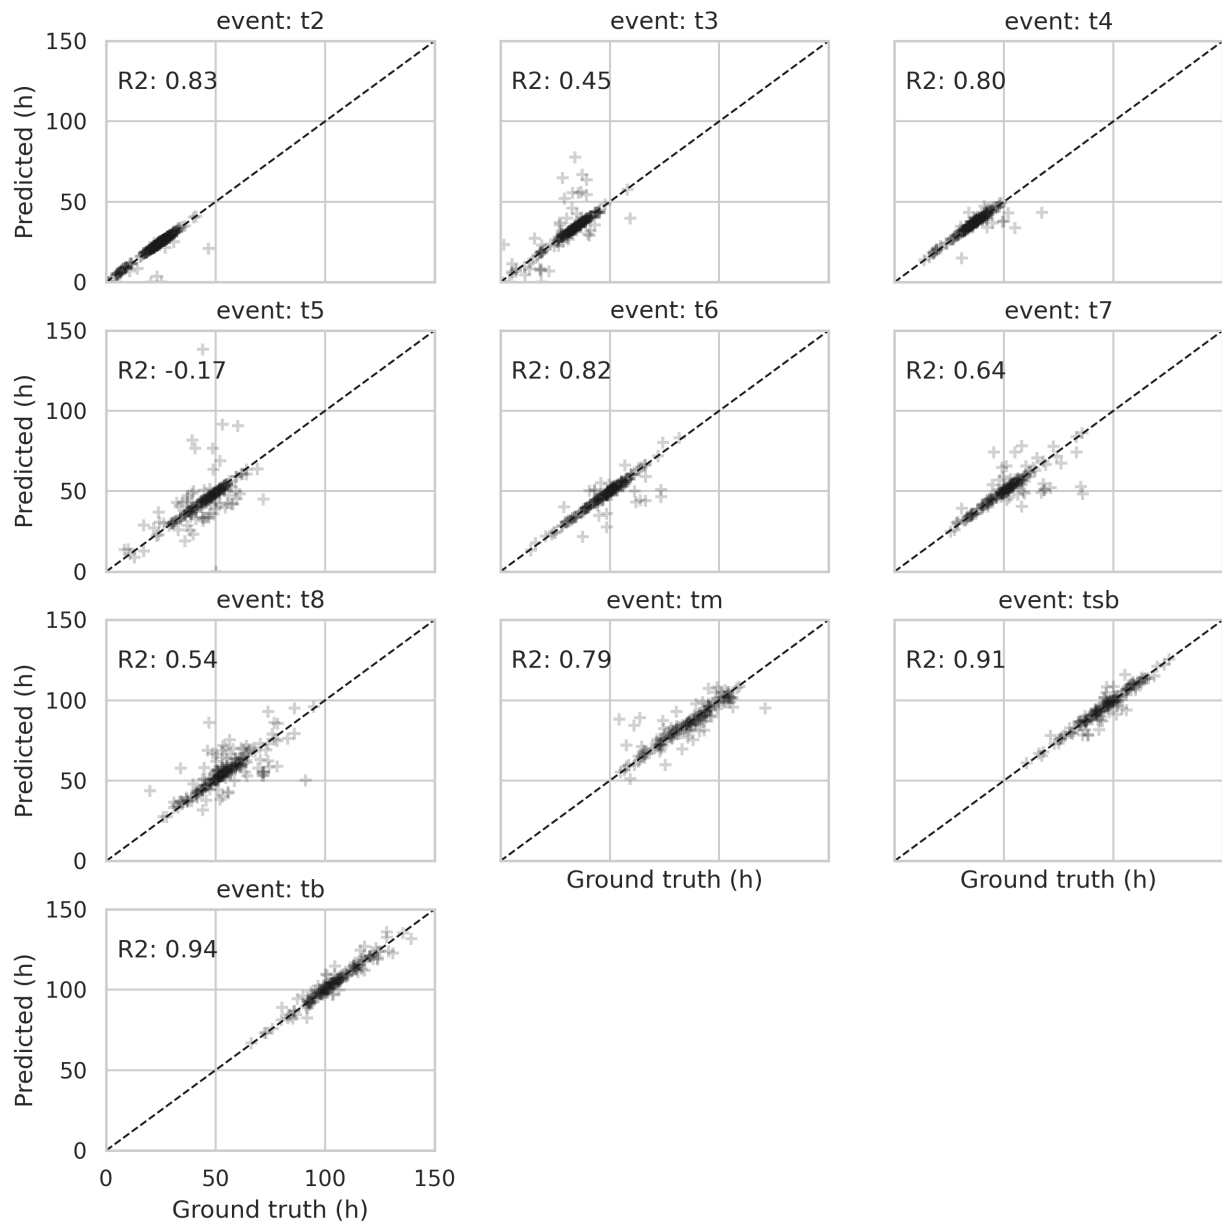

Figure S1: Scatter plot of event start in ground truth vs. predicted event start.  $R^2$  score per event is also presented.

Figure S1 shows a scatter plot of ground truth event start versus predicted event start as well as the  $R^2$  score per event. Some lower  $R^2$  score are impacted by the presence of a few outliers.

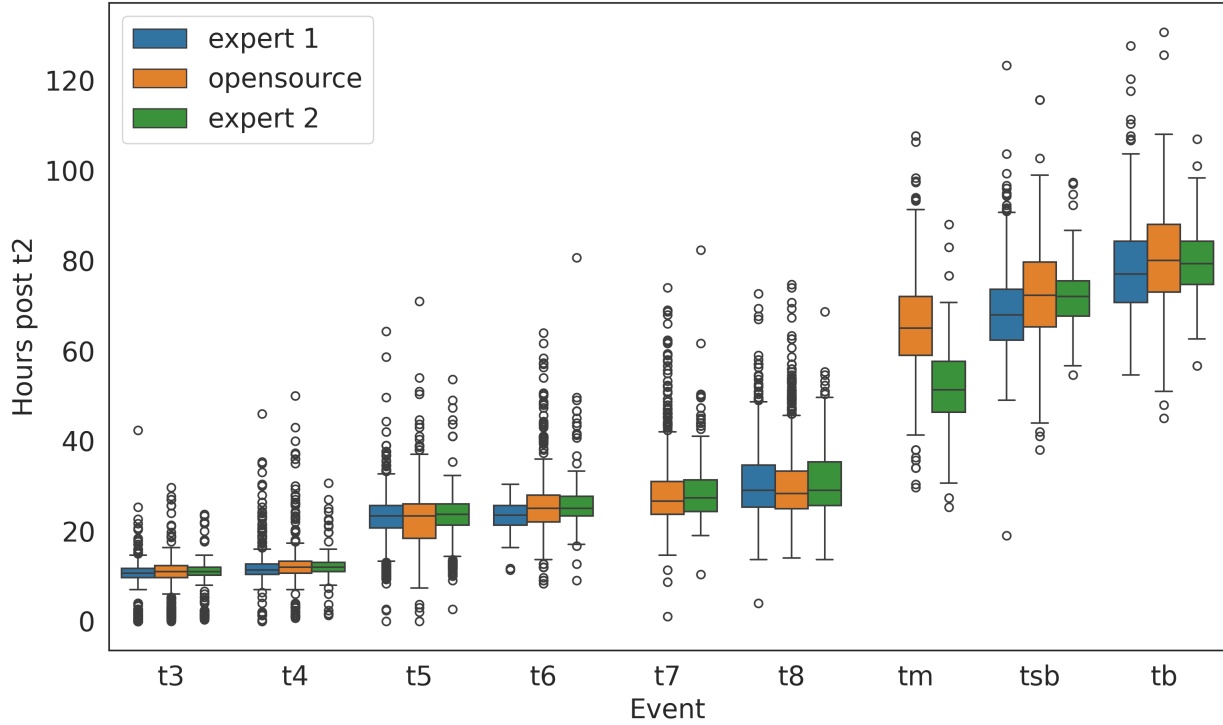

Figure S2: Boxplot for the event start, per annotator, for each event, as the number of hours post t2 start.

Figure S2 shows the boxplot of event start per annotator. To account for possible differences between ICSI and IVF methods, the timings are displayed as hours post t2. We do not have annotations from Expert 1 for t7 and tM events. We can also note the difference on tM between the open-source dataset and Expert 2, which could explain the difficulty for the model to perform well on this event.
